# Supplementary material
Source: PubMed Central journal article supplement (PMC2265145)

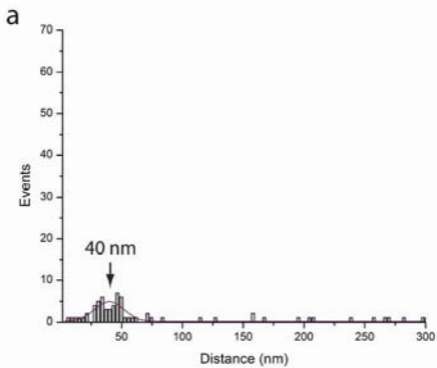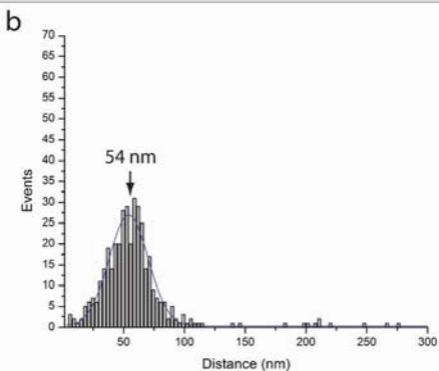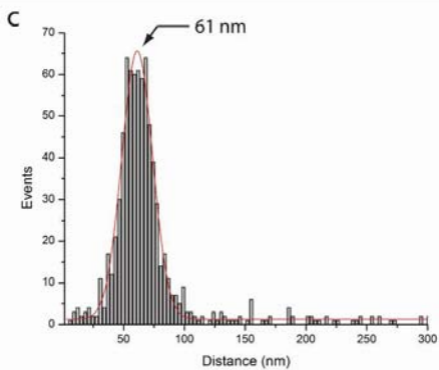

Supplement: pnas_0712351105_1.pdf [file pnas_0712351105_1.pdf]
